# Supplementary material for: Construction of antifungal dual-target (SE, CYP51) pharmacophore models and the discovery of novel antifungal inhibitors
Source: Royal Society of Chemistry journal article supplement (doi:10.1039/c9ra03713f), 2019-01-01

## Supporting Information

### **Construction of the antifungal dual-target (SE, CYP51) pharmacophore model and the discovery of novel antifungal inhibitors**

Yue Dong <sup>a</sup>, Min Liu <sup>a</sup>, Jian Wang <sup>b</sup>, Ding Zhuang <sup>a</sup>, Bin Sun <sup>a\*</sup>

<sup>a</sup>Institute of BioPharmaceutical Research, Liaocheng University, 1 Hunan Road, Liaocheng 252000, PR China

<sup>b</sup>Key Laboratory of Structure-Based Drug Design & Discovery of Ministry of Education, School of Pharmaceutical Engineering, Shenyang Pharmaceutical University, 103 Wenhua Road, Shenhe District, Shenyang 110016, PR China

\*Corresponding author: Bin Sun, E-mail: [goengoy@163.com](mailto:goengoy@163.com)

<sup>1</sup>H NMR, <sup>13</sup>C NMR spectra and HRMS of **5**

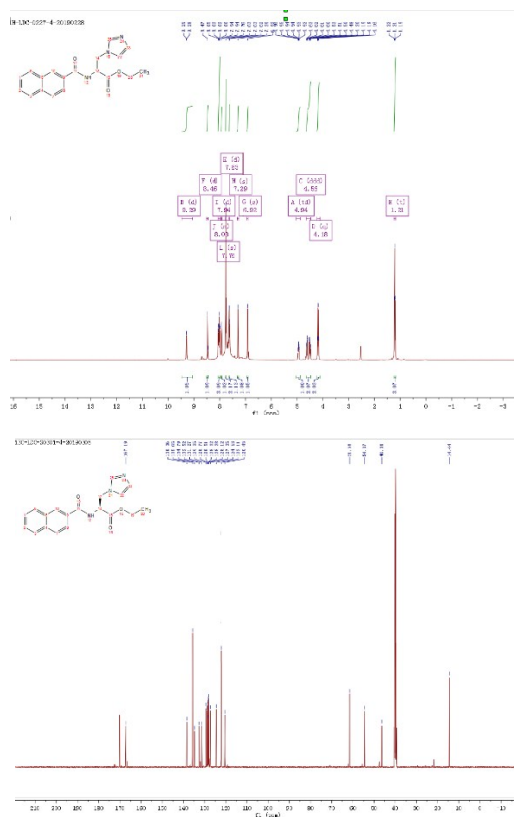

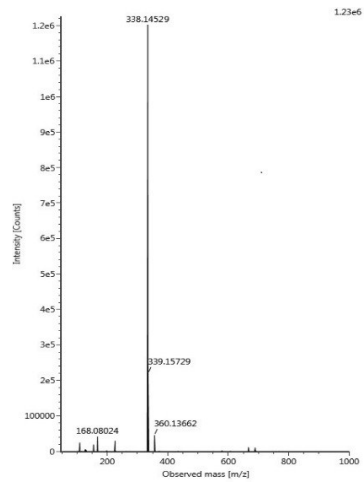

**<sup>1</sup>H NMR, <sup>13</sup>C NMR spectra and HRMS of 6**

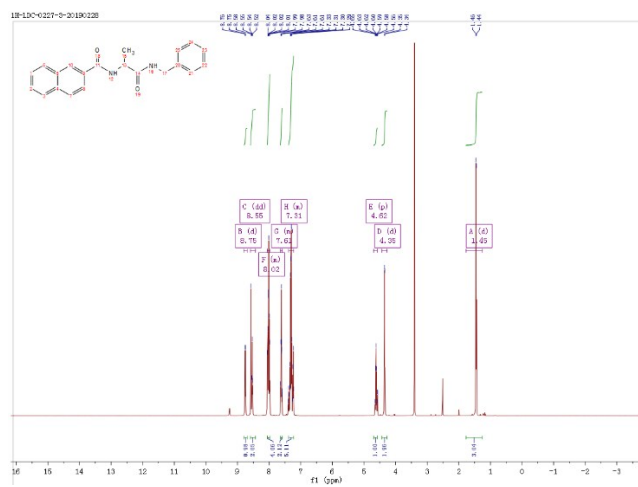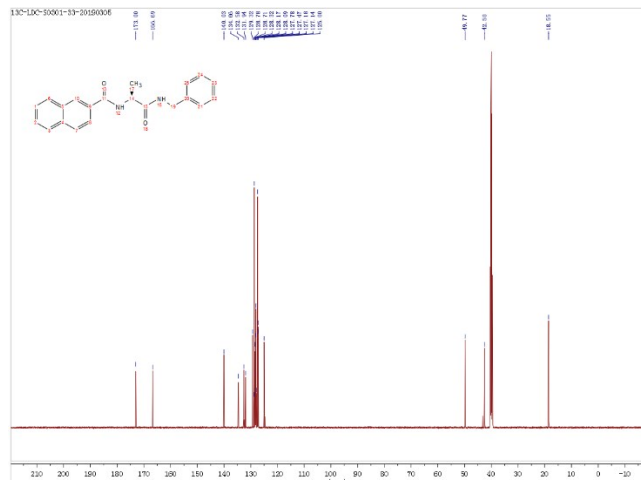

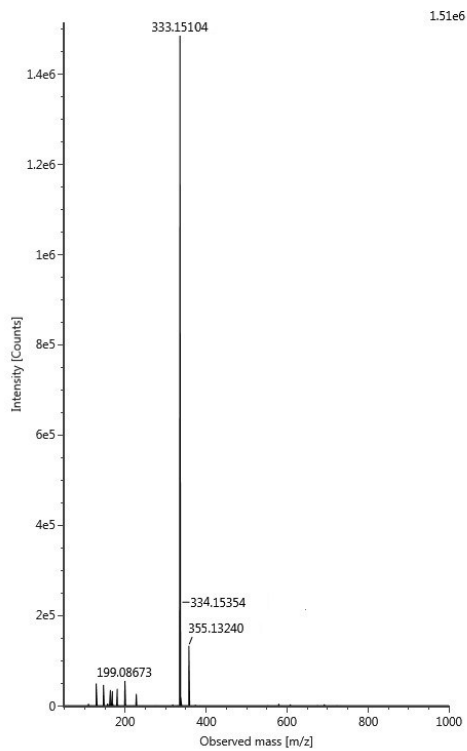

**<sup>1</sup>H NMR, <sup>13</sup>C NMR spectra and HRMS of 8**

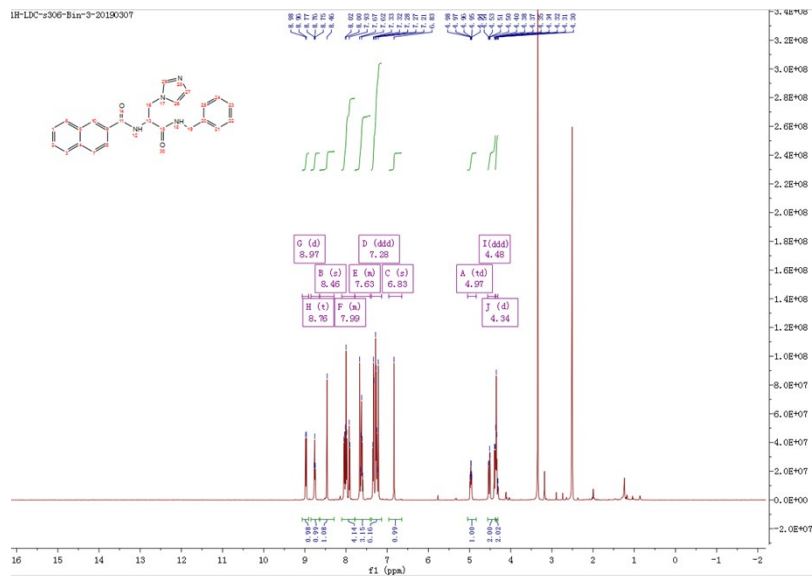

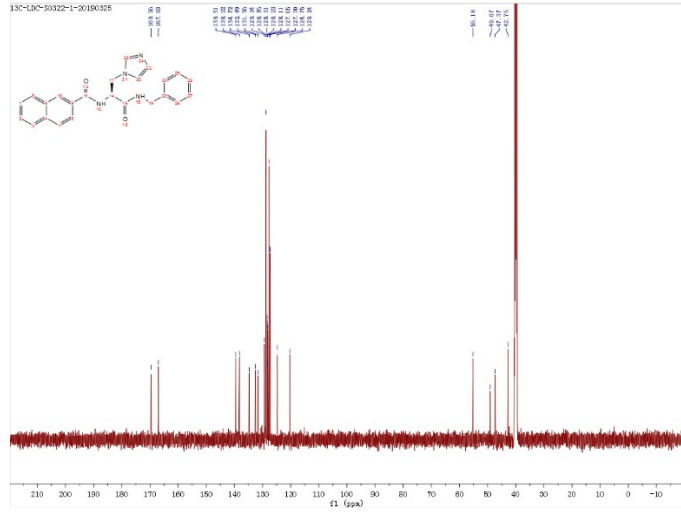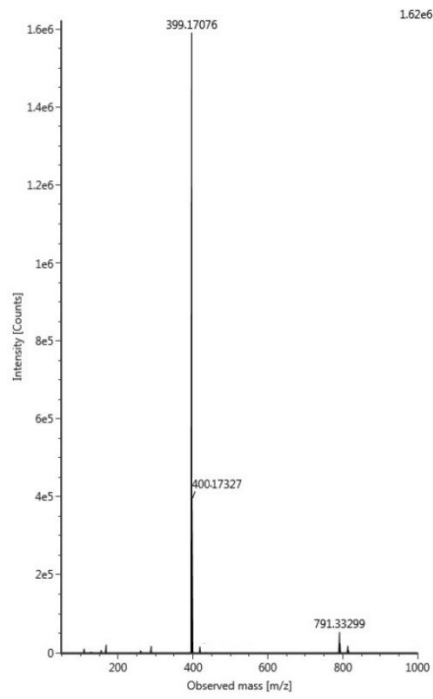

Supplement: c9ra03713f1.pdf [file c9ra03713f1.pdf]
